# Supplementary material for: A green synthesis of Pd nanoparticles supported on modified montmorillonite using aqueous Ocimum sanctum leaf extract: a sustainable catalyst for hydrodechlorination of 4-chlorophenol
Source: Royal Society of Chemistry journal article supplement (doi:10.1039/c6ra22788k), 2016-01-01

## A green synthesis of Pd nanoparticles supported on modified montmorillonite using aqueous *Ocimum sanctum* leaf extract: A sustainable catalyst for Hydrodechlorination of 4-Chlorophenol

Pallab Kumar Saikia<sup>1</sup>, Rakhi Paul Bhattacharjee<sup>1,2</sup>, Podma Pollov Sarmah<sup>1</sup>, Lakshi Saikia<sup>1\*b</sup> and Dipak Kumar Dutta<sup>1\*a</sup>

<sup>1</sup>Materials Sciences and Technology Division, CSIR-North East Institute of Science and Technology, Jorhat 785006, Assam, India.

<sup>2</sup>Academy of Scientific & Innovative Research, Chennai 600113, India

\*b E-mail: [lsaikia@rrljorhat.res.in](mailto:lsaikia@rrljorhat.res.in), Fax: (+)91 376 2370011

\*a E-mail: [dipakkrdutta@yahoo.com](mailto:dipakkrdutta@yahoo.com), [dutta\\_dk@rrljorhat.res.in](mailto:dutta_dk@rrljorhat.res.in), Fax: (+)91 376 2370011

---

### Supporting Information

ESI Fig. 1: PXRD pattern of parent mont. and AT-mont.

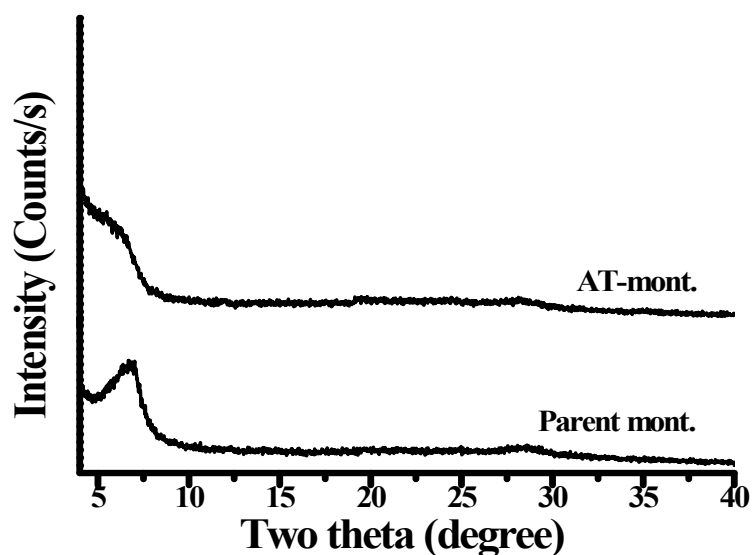

ESI Fig. 2: BET sorption isotherm and BJH pore size distribution (inset) of AT-mont.

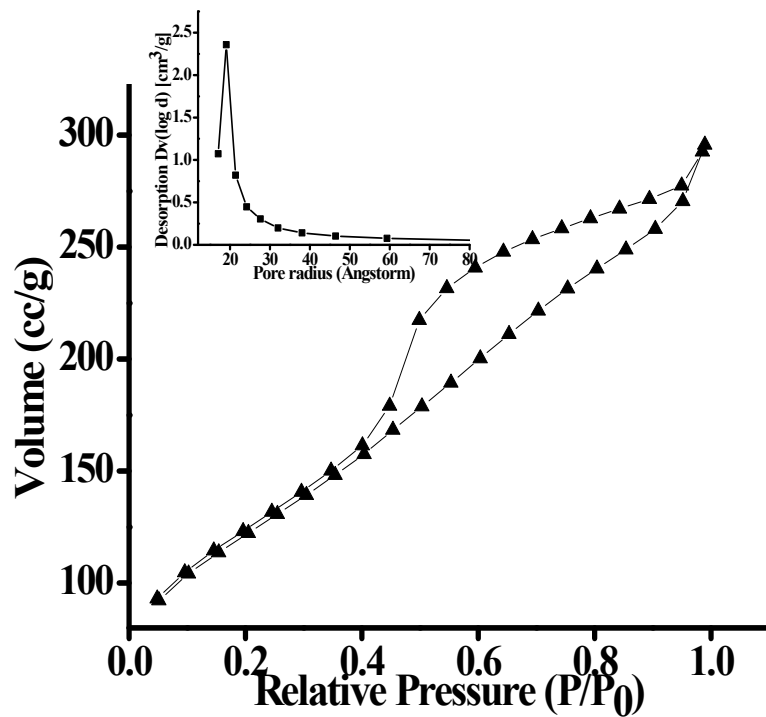

ESI Fig. 3: (a) SEM image and (b) EDX spectra of AT-mont.

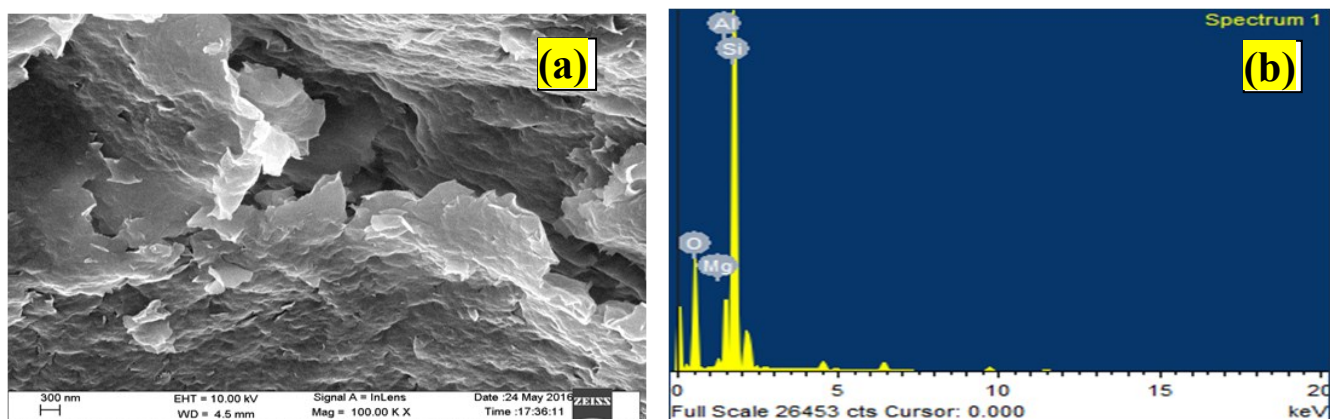

ESI Fig. 4: BET N<sub>2</sub> sorption isotherm of PdNP@AT-mont.

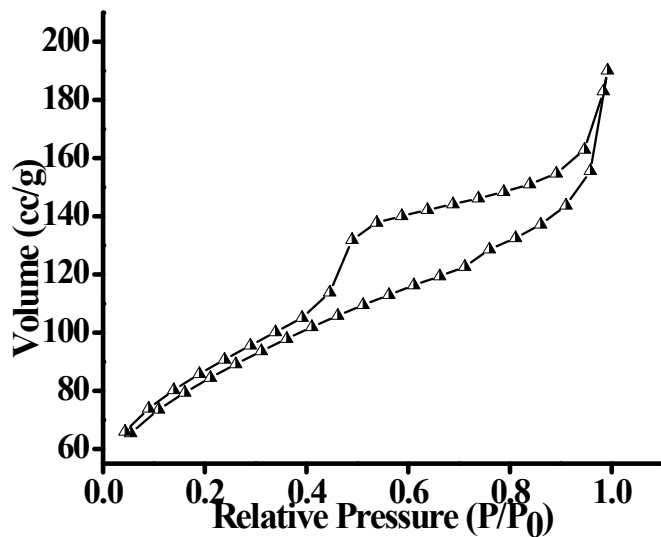

ESI Fig. 5: BJH pore size distribution of PdNP@AT-mont. fresh (before reaction) and after 5th run.

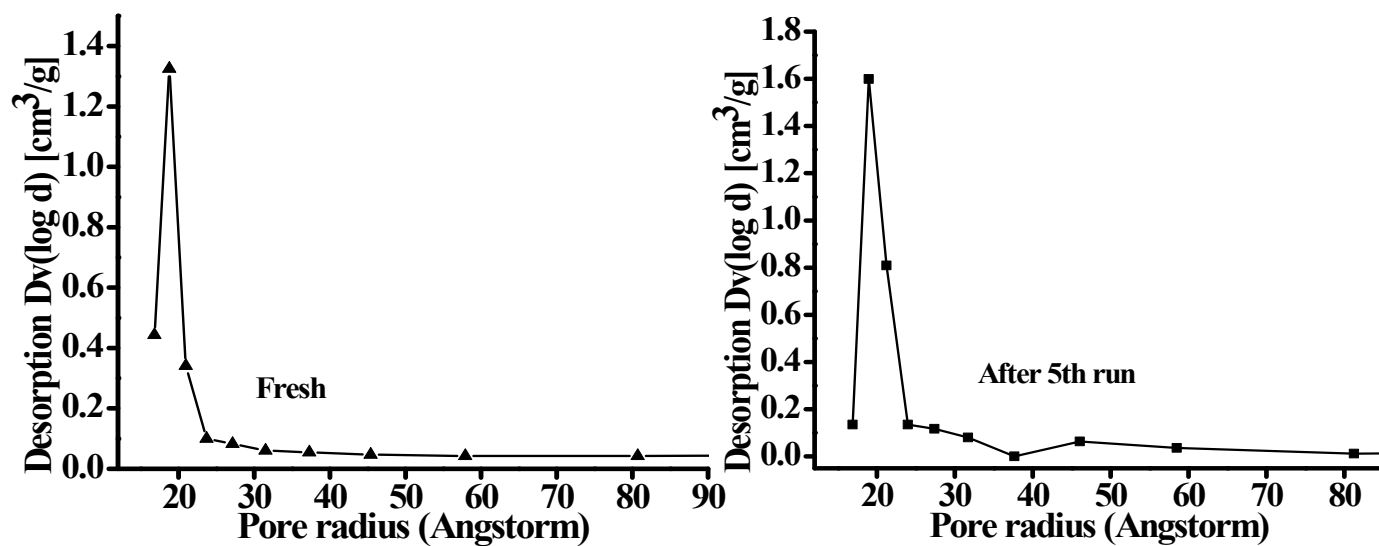

Supplement: c6ra22788k1.pdf [file c6ra22788k1.pdf]
